# Supplementary material
Source: PubMed Central journal article supplement (PMC7935430)
Supplement: NIHMS1673003-supplement-CationPi_SI081120.pdf [file NIHMS1673003-supplement-CationPi_SI081120.pdf]

# Supporting Information

## Explicit Representation of Cation- $\pi$ Interactions in Force Fields with $1/r^4$ Non-bonded Terms

Aysegul Turupcu, Julian Tirado-Rives, and William L. Jorgensen\*

Department of Chemistry, Yale University, New Haven, Connecticut, 06520-8107, United  
States

### Contents

|                                                                                                                 |           |
|-----------------------------------------------------------------------------------------------------------------|-----------|
| <b>Computatioal Methods – DFT Calculations .....</b>                                                            | <b>S2</b> |
| <b>Table S1. <i>Ab initio</i> and DFT Interaction Energies for the Benzene - <math>K^+</math> Complex .....</b> | <b>S2</b> |
| <b>Table S2. Calculated and Experimental Interaction Energies (kcal/mol) at 0 K .....</b>                       | <b>S3</b> |
| <b>Table S3. OPLS/2020 Non-Bonded Parameters for Cations .....</b>                                              | <b>S3</b> |
| <b>Figure S1. Pmfs for the interaction of <math>K^+</math> with benzene and heterocycles .....</b>              | <b>S4</b> |
| <b>Cartesian Coordinates of the Complexes In Figure 2 .....</b>                                                 | <b>S5</b> |
| <b>References .....</b>                                                                                         | <b>S8</b> |

## Computational Methods – DFT Calculations

The Gaussian16 package<sup>1</sup> was used for the ab initio and DFT calculations for the cation- $\pi$  complexes. Geometry optimizations were carried out with B3LYP/6-311++G(d,p) followed by rigid PES scans with  $\omega$ B97X-D/6-311++G(d,p).<sup>2-3</sup> The distance between the cation center and ring center was scanned at 0.1 Å intervals. Counterpoise correction<sup>5,6</sup> was used to offset basis set superposition errors (BSSE) for all interaction energies.

**Table S1. *Ab initio* and DFT Interaction Energies for the Benzene - K<sup>+</sup> Complex**

| Method          | Basis Set          | $\Delta E$ (kcal/mol) | Ref <sup>a</sup>       |
|-----------------|--------------------|-----------------------|------------------------|
| CCSD(T)         | 6-31G(d,p)         | -15.0                 |                        |
| MP2             | 6-311G+(d,p)       | -13.5                 |                        |
| MP2             | 6-311G++(d,p)      | -16.6                 |                        |
| MP2             | 6-311G++(2df, 2pd) | -18.0                 |                        |
| MP2             | 6-311G++(3df, 3pd) | -18.8                 |                        |
| $\omega$ B97X-D | 6-311G++(d,p)      | -18.2                 |                        |
| $\omega$ B97X-D | 6-311G++(2df, 2pd) | -18.4                 |                        |
| $\omega$ B97X-D | 6-311G++(3df, 3pd) | -19.0                 |                        |
| CCSD(T)         | CBS                | -20.1                 | Feller <sup>7</sup>    |
| MP2             | aug-cc-pVDZ        | -18.6                 |                        |
| MP2             | aug-cc-pVTZ        | -19.7                 |                        |
| MP2             | aug-cc-pVQZ        | -20.4                 |                        |
| MP2             | CBS                | -20.8                 |                        |
| CCSD(T)         | def2-TZVPPD        | -16.9                 | Ferretti <sup>8</sup>  |
| $\omega$ B97X-D | def2-TZVPPD        | -17.9                 |                        |
| M062X           | def2-TZVPPD        | -19.3                 |                        |
| PBE0            | def2-TZVPPD        | -16.5                 |                        |
| B3LYP           | def2-TZVPPD        | -15.6                 |                        |
| M06             | 6-311G++(d,p)      | -16.3                 | Davis <sup>9</sup>     |
| M06             | 6-31G++(d,p)       | -20.3                 |                        |
| CCSD(T)         | 6-311G++(2d,2p)    | -16.5                 | Marshall <sup>10</sup> |
| B3LYP           | 6-31G(d,p)         | -15.5                 | Reddy <sup>11</sup>    |
| B3LYP           | 6-311G++(d,p)      | -15.2                 |                        |

<sup>a</sup> This work except as noted.

**Table S2. Calculated and Experimental Interaction Energies (kcal/mol) at 0 K**

| Cation-benzene               | Exp <sup>a</sup>   | $\omega$ B97X-D/<br>6-311++G(d,p) | CCSD(T)/<br>CBS <sup>b</sup> | MP2(full)/<br>6-311+G(2d,2p) <sup>a</sup> |
|------------------------------|--------------------|-----------------------------------|------------------------------|-------------------------------------------|
| Li <sup>+</sup>              | -38.5 ± 3.2        | -38.2                             | -36.1                        | -34.2                                     |
| Na <sup>+</sup>              | -22.1 ± 1.4        | -24.7                             | -24.4                        | -21.4                                     |
| K <sup>+</sup>               | -17.5 ± 0.9        | -18.3                             | -20.0                        | -17.1                                     |
| NH <sub>4</sub> <sup>+</sup> | -19.3 <sup>c</sup> | -18.8                             | -21.4 <sup>d</sup>           | -18.6                                     |
| Rb <sup>+</sup>              | -16.4 ± 0.9        | -13.3                             | -16.3                        | -12.7                                     |
| Cs <sup>+</sup>              | -15.4 ± 1.1        | -11.6                             | -12.4                        | -11.4                                     |

<sup>a</sup> Ref 12. <sup>b</sup> Ref 7. <sup>c</sup> Ref 13, at 298 K. <sup>d</sup> Ref 14.

**Table S3. OPLS/2020 Non-Bonded Parameters for Cations<sup>a</sup>**

| atom                                            | q (e <sup>-</sup> ) | $\sigma$ (Å) | $\epsilon$ (kcal/mol) | $\kappa$ |
|-------------------------------------------------|---------------------|--------------|-----------------------|----------|
| Li <sup>+</sup>                                 | 1.0                 | 2.87         | 0.0005                | 0.45     |
| Na <sup>+</sup>                                 | 1.0                 | 4.07         | 0.0005                | 0.70     |
| K <sup>+</sup>                                  | 1.0                 | 5.17         | 0.0005                | 0.95     |
| Rb <sup>+</sup>                                 | 1.0                 | 5.60         | 0.0005                | 0.70     |
| Cs <sup>+</sup>                                 | 1.0                 | 6.20         | 0.0005                | 0.75     |
| NH <sub>4</sub> <sup>+</sup> - N                | -0.40               | 3.48         | 0.290                 | 1.00     |
| NH <sub>4</sub> <sup>+</sup> - H                | 0.35                | 0.0          | 0.0                   | 0.0      |
| MeNH <sub>3</sub> <sup>+</sup> - N              | -0.30               | 3.48         | 0.290                 | 1.00     |
| MeNH <sub>3</sub> <sup>+</sup> - H <sub>N</sub> | 0.33                | 0.0          | 0.0                   | 0.0      |
| MeNH <sub>3</sub> <sup>+</sup> - C              | 0.13                | 3.50         | 0.066                 | 0.0      |
| MeNH <sub>3</sub> <sup>+</sup> - H <sub>C</sub> | 0.06                | 2.50         | 0.030                 | 0.0      |
| Me <sub>4</sub> N <sup>+</sup> - N              | 0.0                 | 3.48         | 0.290                 | 1.00     |
| Me <sub>4</sub> N <sup>+</sup> - C              | -0.05               | 3.50         | 0.066                 | 0.0      |
| Me <sub>4</sub> N <sup>+</sup> - H <sub>C</sub> | 0.10                | 2.50         | 0.030                 | 0.0      |
| Gdm <sup>+</sup> - N                            | -0.80               | 3.25         | 0.170                 | 0.25     |
| Gdm <sup>+</sup> - H                            | 0.46                | 0.0          | 0.0                   | 0.0      |
| Gdm <sup>+</sup> - C                            | 0.64                | 3.55         | 0.050                 | 0.0      |
| MeGdm <sup>+</sup> - N <sub>Me</sub>            | -0.70               | 3.25         | 0.170                 | 0.25     |
| MeGdm <sup>+</sup> - H <sub>NMe</sub>           | 0.44                | 0.0          | 0.0                   | 0.0      |
| MeGdm <sup>+</sup> - C <sub>Me</sub>            | 0.20                | 3.50         | 0.066                 | 0.0      |
| MeGdm <sup>+</sup> - H <sub>Me</sub>            | 0.06                | 2.50         | 0.030                 | 0.0      |

<sup>a</sup> From Refs. 15-17 and the present work.

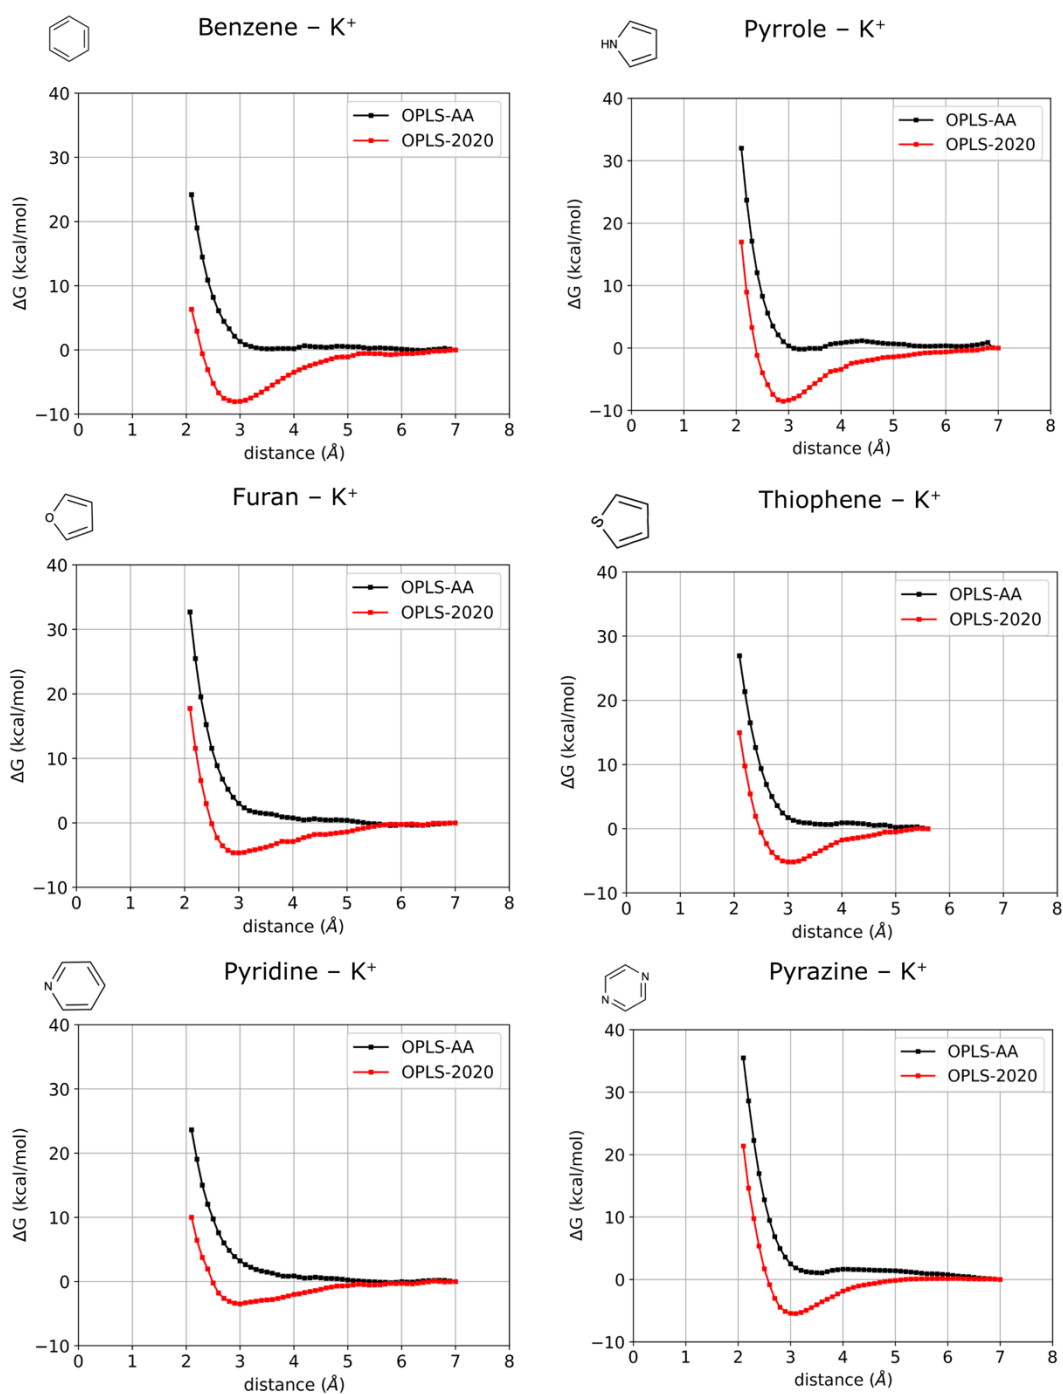

**Figure S1.** Pmfs for the interaction of  $K^+$  with benzene and heterocycles using OPLS-AA (black) or OPLS/2020 (red), which includes the  $1/r^4$  terms for cation- $\pi$  interactions.

**Cartesian Coordinates of the Complexes In Figure 2**

| <b>(A) Benzene-NH<sub>4</sub><sup>+</sup> (bidendate)</b> |        |        |        | <b>(B) Benzene-NH<sub>4</sub><sup>+</sup> (monodendate)</b> |        |        |        |
|-----------------------------------------------------------|--------|--------|--------|-------------------------------------------------------------|--------|--------|--------|
| C                                                         | -1.2   | 0      | -0.709 | C                                                           | -1.2   | 0      | -0.709 |
| C                                                         | -1.214 | 0      | 0.684  | C                                                           | -1.214 | 0      | 0.684  |
| C                                                         | -0.014 | 0      | 1.393  | C                                                           | -0.014 | 0      | 1.393  |
| C                                                         | 1.2    | 0      | 0.709  | C                                                           | 1.2    | 0      | 0.709  |
| C                                                         | 1.214  | 0      | -0.684 | C                                                           | 1.214  | 0      | -0.684 |
| C                                                         | 0.014  | 0      | -1.393 | C                                                           | 0.014  | 0      | -1.393 |
| H                                                         | -2.158 | 0      | 1.217  | H                                                           | -2.158 | 0      | 1.217  |
| H                                                         | -0.025 | 0      | 2.477  | H                                                           | -0.025 | 0      | 2.477  |
| H                                                         | 2.133  | 0      | 1.26   | H                                                           | 2.133  | 0      | 1.26   |
| H                                                         | 2.158  | 0      | -1.217 | H                                                           | 2.158  | 0      | -1.217 |
| H                                                         | 0.025  | 0      | -2.477 | H                                                           | 0.025  | 0      | -2.477 |
| H                                                         | -2.132 | 0      | -1.26  | H                                                           | -2.132 | 0      | -1.26  |
| N                                                         | 0      | -2.9   | 0      | N                                                           | 0      | -3     | 0      |
| H                                                         | 0.412  | -3.493 | 0.73   | H                                                           | 0.833  | -3.342 | 0.492  |
| H                                                         | -0.412 | -3.493 | -0.73  | H                                                           | 0.01   | -3.342 | -0.968 |
| H                                                         | -0.73  | -2.307 | 0.412  | H                                                           | -0.843 | -3.342 | 0.475  |
| H                                                         | 0.73   | -2.307 | -0.412 | H                                                           | 0      | -1.973 | 0      |

  

| <b>(C) Indole-NH<sub>4</sub><sup>+</sup> π6</b> |        |        |        | <b>(D) Indole-NH<sub>4</sub><sup>+</sup> π5</b> |        |        |        |
|-------------------------------------------------|--------|--------|--------|-------------------------------------------------|--------|--------|--------|
| C                                               | 0      | 0      | 0      | C                                               | 0      | 0      | 0      |
| C                                               | 0      | 0      | 1.434  | C                                               | 0      | 0      | 1.434  |
| C                                               | 1.19   | 0      | 2.185  | C                                               | 1.19   | 0      | 2.185  |
| C                                               | 2.393  | -0.117 | 1.483  | C                                               | 2.393  | -0.117 | 1.483  |
| C                                               | 2.415  | -0.167 | 0.064  | C                                               | 2.415  | -0.167 | 0.064  |
| C                                               | 1.234  | -0.149 | -0.678 | C                                               | 1.234  | -0.149 | -0.678 |
| C                                               | -1.37  | 0.029  | -0.418 | C                                               | -1.37  | 0.029  | -0.418 |
| C                                               | -2.137 | 0.069  | 0.73   | C                                               | -2.137 | 0.069  | 0.73   |
| H                                               | 1.177  | -0.011 | 3.272  | H                                               | 1.177  | -0.011 | 3.272  |
| H                                               | 3.328  | -0.172 | 2.034  | H                                               | 3.328  | -0.172 | 2.034  |
| H                                               | 3.366  | -0.309 | -0.444 | H                                               | 3.366  | -0.309 | -0.444 |
| H                                               | 1.26   | -0.229 | -1.763 | H                                               | 1.26   | -0.229 | -1.763 |
| H                                               | -1.751 | 0      | -1.43  | H                                               | -1.751 | 0      | -1.43  |
| H                                               | -1.633 | -0.002 | 2.793  | H                                               | -1.633 | -0.002 | 2.793  |
| N                                               | -1.312 | 0.08   | 1.838  | N                                               | -1.312 | 0.08   | 1.838  |
| H                                               | -3.212 | 0.08   | 0.848  | H                                               | -3.212 | 0.08   | 0.848  |
| N                                               | 1.025  | -2.062 | 0.846  | N                                               | -1.015 | -1.963 | 0.747  |
| H                                               | 0.543  | -2.397 | 0.024  | H                                               | -0.078 | -2.326 | 0.642  |
| H                                               | 0.498  | -2.312 | 1.671  | H                                               | -1.592 | -2.297 | -0.012 |
| H                                               | 1.116  | -1.057 | 0.796  | H                                               | -0.989 | -0.954 | 0.732  |
| H                                               | 1.943  | -2.481 | 0.893  | H                                               | -1.401 | -2.277 | 1.626  |

| (E) Benzene-TMA <sup>+</sup> |        |        |        | (F) Benzene-Gdm <sup>+</sup> (T-shaped) |        |        |        |
|------------------------------|--------|--------|--------|-----------------------------------------|--------|--------|--------|
| C                            | 0.005  | -0.476 | 1.332  | C                                       | 0      | 0      | 0      |
| C                            | 0.001  | -1.392 | 0.254  | C                                       | 0      | 0      | 1.395  |
| C                            | 0.003  | 0.916  | 1.078  | C                                       | 1.208  | 0      | 2.092  |
| C                            | -0.003 | -0.916 | -1.078 | C                                       | 2.416  | 0      | 1.395  |
| C                            | -0.002 | 1.392  | -0.254 | C                                       | 2.416  | 0      | 0      |
| C                            | -0.005 | 0.476  | -1.332 | C                                       | 1.208  | 0      | -0.697 |
| H                            | 0.048  | -0.843 | 2.359  | H                                       | -0.952 | 0      | -0.55  |
| H                            | 0.042  | -2.465 | 0.45   | H                                       | -0.952 | 0      | 1.945  |
| H                            | 0.046  | 1.622  | 1.909  | H                                       | 1.208  | 0      | 3.192  |
| H                            | 0.034  | -1.622 | -1.91  | H                                       | 3.368  | 0      | 1.945  |
| H                            | 0.037  | 2.465  | -0.45  | H                                       | 3.368  | 0      | -0.55  |
| H                            | 0.031  | 0.842  | -2.36  | H                                       | 1.208  | 0      | -1.797 |
| N                            | -4.424 | -0.003 | 0      | C                                       | 1.415  | -4.031 | 0.827  |
| C                            | -5.952 | -0.007 | 0.004  | N                                       | 1.531  | -5.354 | 0.782  |
| C                            | -3.914 | 1.099  | -0.931 | N                                       | 0.788  | -3.429 | 1.833  |
| H                            | -6.296 | -0.8   | 0.674  | N                                       | 1.92   | -3.262 | -0.131 |
| H                            | -6.301 | 0.968  | 0.357  | H                                       | 1.147  | -5.93  | 1.509  |
| H                            | -6.302 | -0.191 | -1.016 | H                                       | 2.005  | -5.809 | 0.022  |
| H                            | -2.82  | 1.085  | -0.916 | H                                       | 0.7    | -2.429 | 1.867  |
| H                            | -4.293 | 2.059  | -0.567 | H                                       | 0.386  | -3.958 | 2.586  |
| H                            | -4.29  | 0.899  | -1.939 | H                                       | 2.404  | -3.659 | -0.916 |
| C                            | -3.908 | -1.359 | -0.49  | H                                       | 1.832  | -2.262 | -0.097 |
| C                            | -3.906 | 0.253  | 1.418  |                                         |        |        |        |
| H                            | -2.814 | -1.334 | -0.484 |                                         |        |        |        |
| H                            | -4.285 | -1.525 | -1.503 |                                         |        |        |        |
| H                            | -4.28  | -2.134 | 0.187  |                                         |        |        |        |
| H                            | -2.812 | 0.251  | 1.391  |                                         |        |        |        |
| H                            | -4.278 | -0.544 | 2.069  |                                         |        |        |        |
| H                            | -4.283 | 1.224  | 1.751  |                                         |        |        |        |

| (G) Benzene-Gdm <sup>+</sup> (Stacked) |        |        |        | Indole-Gdm <sup>+</sup> π6 (Stacked) |        |        |        |
|----------------------------------------|--------|--------|--------|--------------------------------------|--------|--------|--------|
| C                                      | 0      | 1.4    | 0      | C                                    | 0      | 0      | 0      |
| C                                      | 0      | 0.695  | -1.22  | C                                    | 0      | 0      | 1.434  |
| C                                      | 0      | 0.694  | 1.219  | C                                    | 1.19   | 0      | 2.185  |
| C                                      | 0.002  | -0.714 | -1.223 | C                                    | 2.393  | -0.117 | 1.483  |
| C                                      | 0.001  | -0.716 | 1.218  | C                                    | 2.415  | -0.167 | 0.064  |
| C                                      | 0.001  | -1.419 | -0.003 | C                                    | 1.234  | -0.149 | -0.678 |
| H                                      | -0.039 | 2.48   | 0.001  | C                                    | -1.37  | 0.029  | -0.418 |
| H                                      | -0.039 | 1.236  | -2.156 | C                                    | -2.137 | 0.069  | 0.73   |
| H                                      | -0.039 | 1.233  | 2.156  | H                                    | 1.177  | -0.011 | 3.272  |
| H                                      | -0.037 | -1.253 | -2.159 | H                                    | 3.328  | -0.172 | 2.034  |
| H                                      | -0.037 | -1.256 | 2.153  | H                                    | 3.366  | -0.309 | -0.444 |
| H                                      | -0.037 | -2.5   | -0.004 | H                                    | 1.26   | -0.229 | -1.763 |
| C                                      | 3.526  | 0      | 0.005  | H                                    | -1.751 | 0      | -1.43  |
| N                                      | 3.535  | 0.678  | -1.146 | H                                    | -1.633 | -0.002 | 2.793  |
| H                                      | 3.503  | 0.216  | -2.046 | N                                    | -1.312 | 0.08   | 1.838  |
| H                                      | 3.516  | 1.689  | -1.179 | H                                    | -3.212 | 0.08   | 0.848  |
| N                                      | 3.547  | 0.658  | 1.167  | C                                    | 1.352  | 2.422  | 0.662  |
| H                                      | 3.529  | 1.668  | 1.217  | N                                    | 0.198  | 2.512  | 1.315  |
| H                                      | 3.525  | 0.18   | 2.059  | H                                    | -0.677 | 2.547  | 0.822  |
| N                                      | 3.53   | -1.336 | -0.007 | H                                    | 0.169  | 2.546  | 2.318  |
| H                                      | 3.507  | -1.884 | 0.844  | N                                    | 2.496  | 2.381  | 1.338  |
| H                                      | 3.497  | -1.869 | -0.866 | H                                    | 2.509  | 2.419  | 2.342  |
|                                        |        |        |        | H                                    | 3.378  | 2.31   | 0.863  |
|                                        |        |        |        | N                                    | 1.363  | 2.373  | -0.665 |
|                                        |        |        |        | H                                    | 2.225  | 2.308  | -1.177 |
|                                        |        |        |        | H                                    | 0.509  | 2.401  | -1.194 |

## REFERENCES

- (1) Frisch, M. J.; Trucks, G. W.; Schlegel, H. B.; Scuseria, G. E.; Robb, M. A.; Cheeseman, J. R.; Scalmani, G.; Barone, V.; Petersson, G. A.; Nakatsuji, H.; et al. *Gaussian16*, Revision C.01. Gaussian, Inc., Wallingford CT (2016).
- (2) Becke, A. D. Density-Functional Thermochemistry. III. The Role of Exact Exchange. *J. Chem. Phys.* **1993**, *98*, 5648–5652.
- (3) Hehre, W. J., Radom, L., Schleyer, P. V. R., Pople, J. A. *Ab Initio Molecular Orbital Theory*. Wiley, New York (1986).
- (4) Mardirossian, N.; Head-Gordan, M.  $\omega$ B97X-V: A 10-parameter, range-separated hybrid, generalized gradient approximation density functional with nonlocal correlation, designed by a survival-of-the-fittest strategy. *Phys. Chem. Chem. Phys.*, **2014**, *16*, 9904–9924.
- (5) Boys, S. F.; Bernardi, F. Calculation of Small Molecular Interactions by Differences of Separate Total Energies – Some Procedures with Reduced Errors. *Mol. Phys.*, **1970**, *19*, 553.
- (6) Simon, S.; Duran, M.; Dannenberg, J. J. How does basis set superposition error change the potential surfaces for hydrogen bonded dimers? *J. Chem. Phys.*, **1996**, *105*, 11024–31.
- (7) Feller, D.; Dixon, D. A.; Nicholas, J. B. Binding Enthalpies for Alkali Cation-Benzene Complexes Revisited. *J. Phys. Chem. A* **2000**, *104*, 11414–11419.
- (8) Ferretti, A.; D'ischia, M.; Prampolini, G. Benchmarking Cation- $\pi$  Interactions: Assessment of Density Functional Theory and Möller-Plesset Second-Order Perturbation Theory Calculations with Optimized Basis Sets (Mp 2 Mod) for Complexes of Benzene, Phenol, and Catechol with Na<sup>+</sup>, K<sup>+</sup>, Rb<sup>+</sup>, and Cs<sup>+</sup>. *J. Phys. Chem. A* **2020**, *124*, 3445–3459.
- (9) Davis, M. R.; Dougherty, D. A. Cation- $\pi$  Interactions: Computational Analyses of the Aromatic Box Motif and the Fluorination Strategy for Experimental Evaluation. *Phys. Chem. Chem. Phys.* **2015**, *17*, 29262–29270.
- (10) Marshall, M. S.; Steele, R. P.; Thanthiriwatte, K. S.; Sherrill, C. D. Potential Energy Curves for Cation- $\pi$  Interactions: Off-Axis Configurations Are Also Attractive. *J. Phys. Chem. A* **2009**, *113*, 13628–13632.



- (11) Reddy, A. S.; Sastry, G. N. Cation [M = H<sup>+</sup>, Li<sup>+</sup>, Na<sup>+</sup>, K<sup>+</sup>, Ca<sup>2+</sup>, Mg<sup>2+</sup>, NH<sub>4</sub><sup>+</sup>, and NMe<sub>4</sub><sup>+</sup>] Interactions with the Aromatic Motifs of Naturally Occurring Amino Acids: A Theoretical Study. *J. Phys. Chem. A* **2005**, *109*, 8893–8903.
- (12) Amicangelo, J. C.; Armentrout, P. B. Absolute Binding Energies of Alkali-Metal Cation Complexes with Benzene Determined by Threshold Collision-Induced Dissociation Experiments and Ab Initio Theory. *J. Phys. Chem. A* **2000**, *104*, 11420–11432.
- (13) Deakyne, C. A.; Meot-Ner, M. Unconventional Hydrogen Bonds. 2. NH<sup>+</sup>... $\pi$ -Complexes of Onium Ions with Olefins and Benzene Derivatives. *J. Am. Chem. Soc.* **1985**, *107*, 474-479.
- (14) Singh, N. J.; Min, S. K.; Kim, D. Y.; Kim, K. S. Comprehensive Energy Analysis for Various Types of  $\pi$ -Interaction. *J. Chem. Theory Comput.* **2009**, *5*, 515–529.
- (15) Jensen, K. P.; Jorgensen, W. L. Halide, Ammonium, and Alkali Metal Ion Parameters for Modeling Aqueous Solutions. *J. Chem. Theory Comput.* **2006**, *2*, 1499–1509.
- (16) Jorgensen, W. L.; Gao, J. Monte Carlo Simulations of the Hydration of Ammonium and Carboxylate Ions. *J. Phys. Chem.* **1986**, *90*, 2174-2182.
- (17) Duffy, E. M.; Kowalczyk, P. J.; Jorgensen, W. L. Do Denaturants Interact with Aromatic Hydrocarbons in Water? *J. Am. Chem. Soc.* **1993**, *115*, 9271-9275.
